# Supplementary material for: Phenotypic and molecular characterisation of CDK13-related congenital heart defects, dysmorphic facial features and intellectual developmental disorders
Source: PubMed Central journal article supplement (PMC5557075; doi:10.1186/s13073-017-0463-8), 2017-08-14
Supplement: 13073_2017_463_MOESM1_ESM.pdf [file 13073_2017_463_MOESM1_ESM.pdf]

| Sex, ID | Gene:                                                                       | Nucleotide Variant: | Protein Alteration: | De novo: | Zygoty: | ExAC / gnomAD Allele Frequency |
|---------|-----------------------------------------------------------------------------|---------------------|---------------------|----------|---------|--------------------------------|
| F, 1001 | CDK13                                                                       | c.2524A>G           | p.N842D             | Yes      | het     | Not present                    |
|         | No other pathogenic, likely pathogenic or <i>de novo</i> variants reported. |                     |                     |          |         |                                |
| F, 1002 | CDK13                                                                       | c.2525A>G           | p.N842S             | Yes      | het     | Not present                    |
|         | No other pathogenic, likely pathogenic or <i>de novo</i> variants reported. |                     |                     |          |         |                                |
| M, 1003 | CDK13                                                                       | c.2525A>G           | p.N842S             | Yes      | het     | Not present                    |
|         | No other pathogenic, likely pathogenic or <i>de novo</i> variants reported. |                     |                     |          |         |                                |
| M, 1004 | CDK13                                                                       | c.2525A>G           | p.N842S             | Yes      | het     | Not present                    |
|         | No other pathogenic, likely pathogenic or <i>de novo</i> variants reported. |                     |                     |          |         |                                |
| F, 1005 | CDK13                                                                       | c.2525A>G           | p.N842S             | Yes      | het     | Not present                    |
|         | No other pathogenic, likely pathogenic or <i>de novo</i> variants reported. |                     |                     |          |         |                                |
| F, 1006 | CDK13                                                                       | c.2525A>G           | p.N842S             | Yes      | het     | Not present                    |
|         | No other pathogenic, likely pathogenic or <i>de novo</i> variants reported. |                     |                     |          |         |                                |
| M, 1007 | CDK13                                                                       | c.2525A>G           | p.N842S             | Yes      | het     | Not present                    |
|         | No other pathogenic, likely pathogenic or <i>de novo</i> variants reported. |                     |                     |          |         |                                |
| M, 1008 | CDK13                                                                       | c.2200A>G           | p.K734E             | Yes      | het     | Not present                    |
|         | No other pathogenic, likely pathogenic or <i>de novo</i> variants reported. |                     |                     |          |         |                                |

**TABLE S1: List of all pathogenic, likely pathogenic or *de novo* variants identified on the clinical genetics laboratory report for Individuals 1001-1008.** No additional pathogenic, likely pathogenic or *de novo* variants were reported on the clinical laboratory exome sequencing reports. None of the *CDK13* variants in this study are listed in ExAC or gnomAD databases (accessed on 6/17/17). Note that ID 1009 was obtained from research sequencing and a paternal sample was not available, thus *de novo* status is unknown. *CDK13* Isoform: NM\_003718.
